# Supplementary material for: Simple, common but functional: biocompatible and luminescent rare-earth doped magnesium and calcium hydroxides from miniemulsion
Source: Royal Society of Chemistry journal article supplement (doi:10.1039/c4tb01206b), 2014-01-01
Supplement: c4tb01206b1.pdf [file c4tb01206b1.pdf]

# ELECTRONIC SUPPLEMENTARY INFORMATION (ESI)

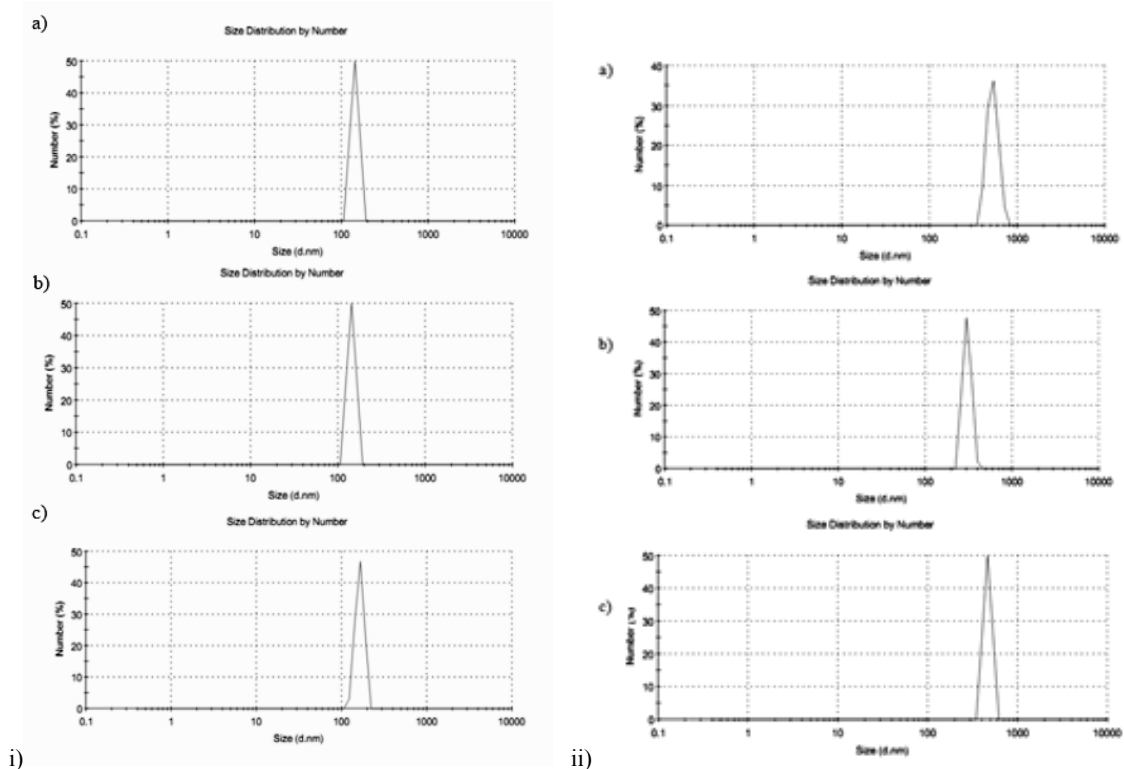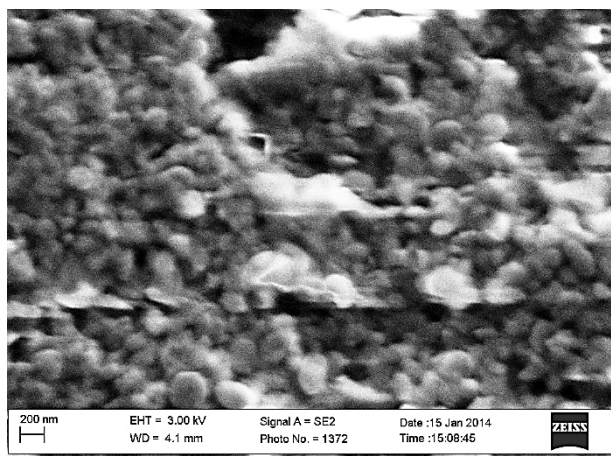

Figure E.S.I. 2 SEM micrograph of Ca<sub>span</sub>

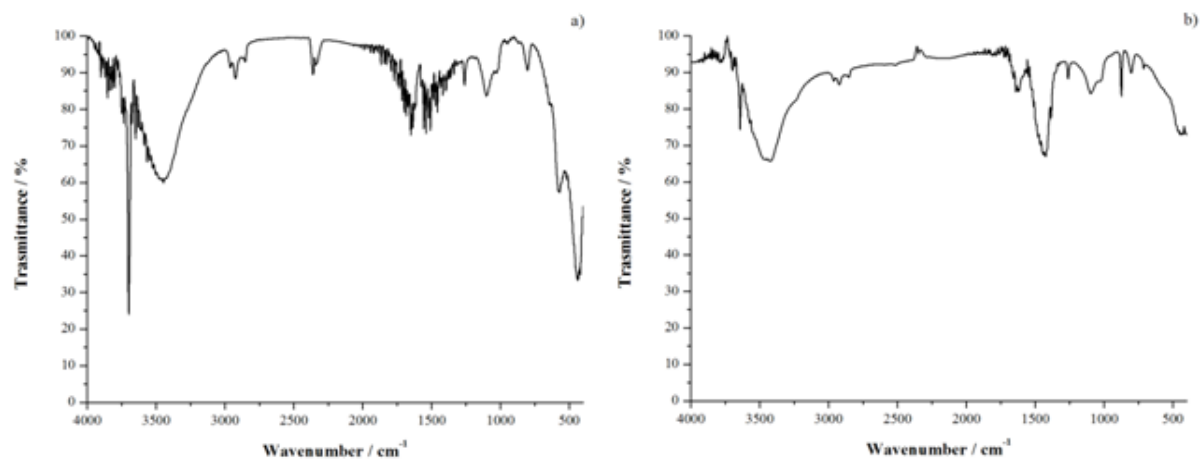

**Figure E.S.I. 3.** a). IR spectra of  $\text{Mg}(\text{OH})_2$  (a) and  $\text{Ca}(\text{OH})_2$  (b) NPs synthesized with 3:1 mix

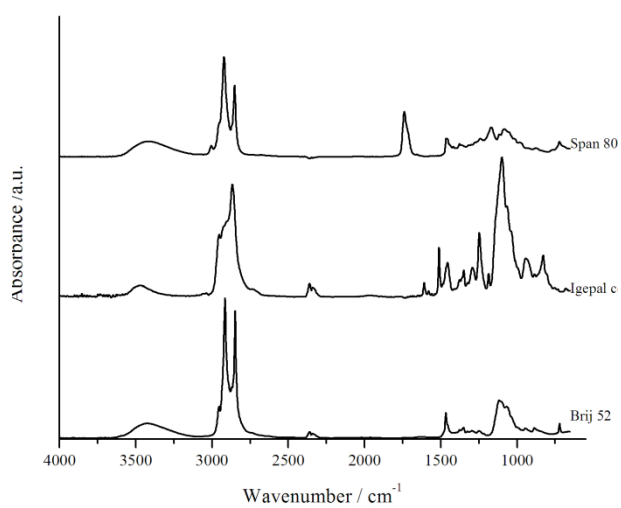

**Figure E.S.I. 4.** Raman spectra of the used surfactants

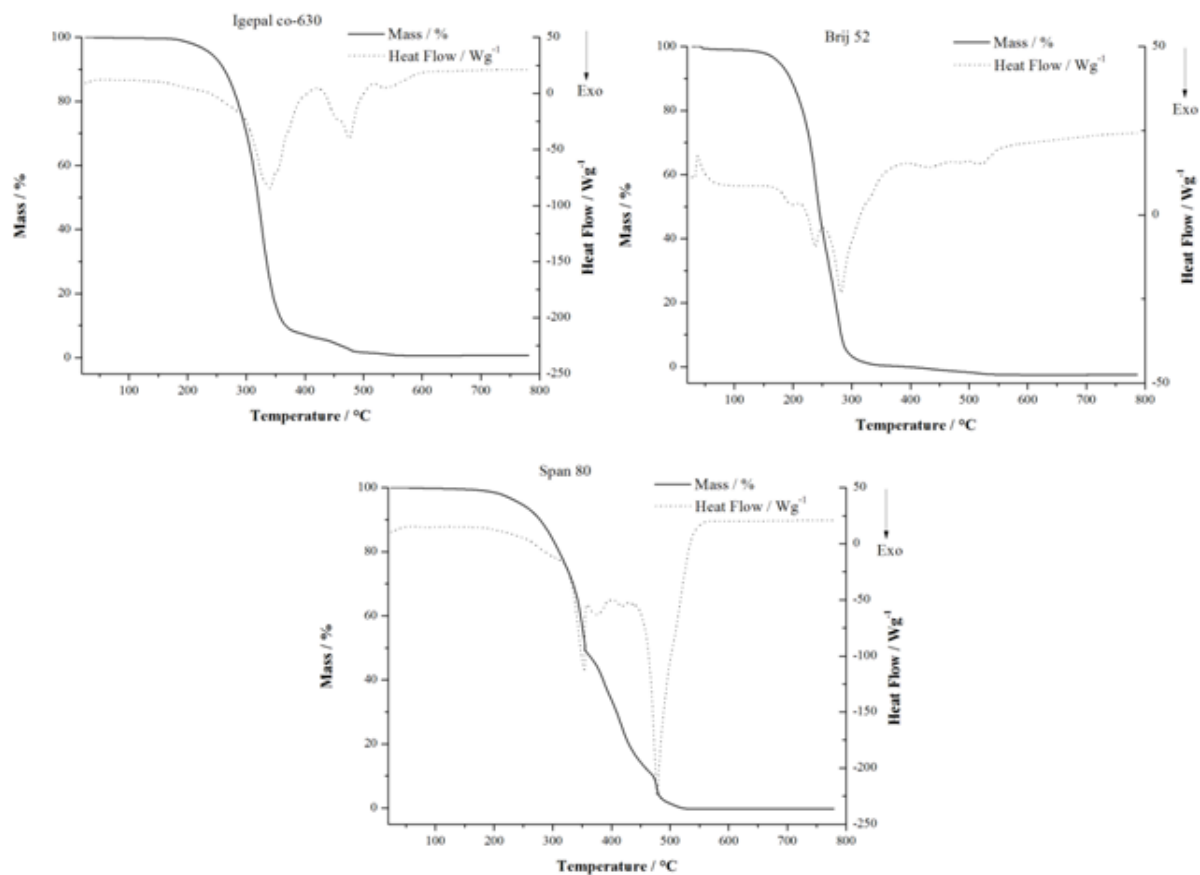

Figure E.S.I. 5. TGA-DSC data of pure surfactants

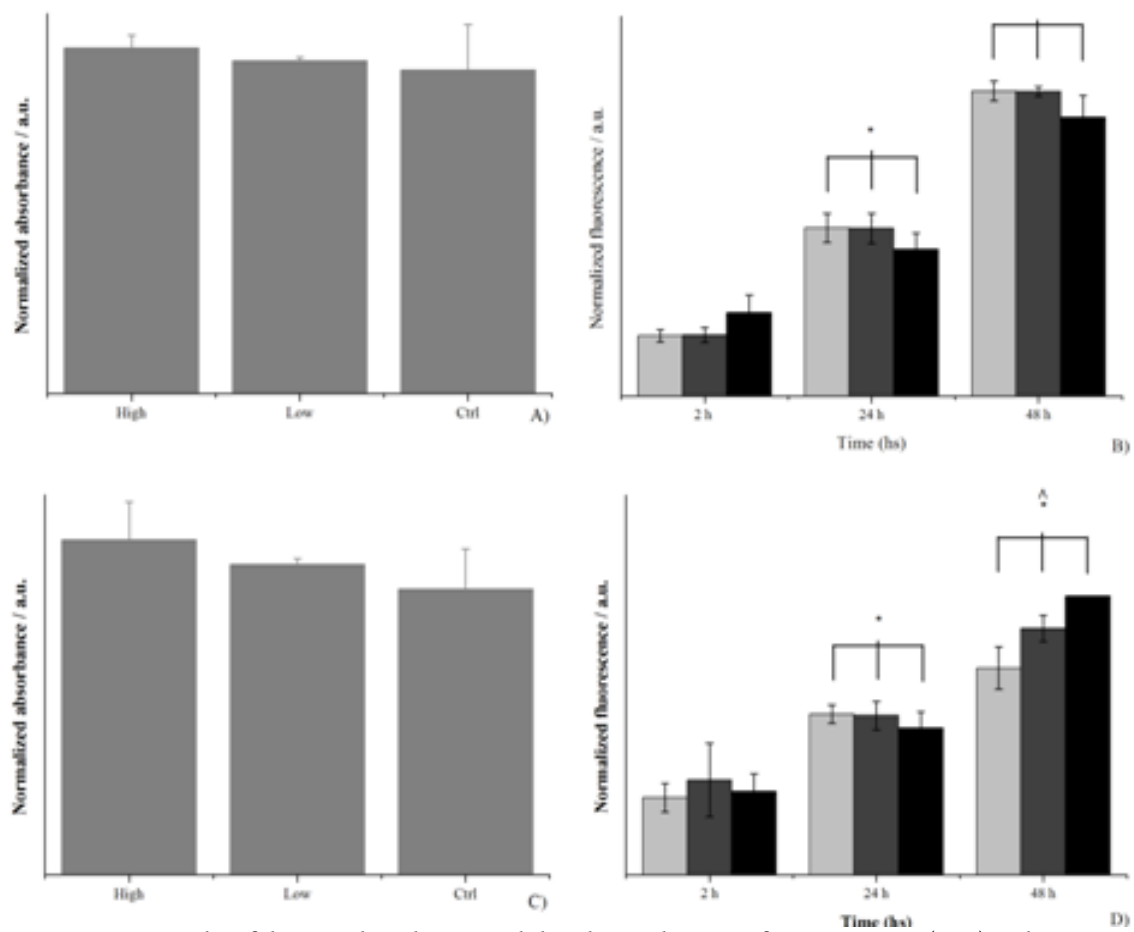

Figure E.S.I. 6. Results of the LDH-based assay and the AlamarBlue assay for Ca\_mix NPs (A, B) and Mg\_Sm\_mix (C, D)

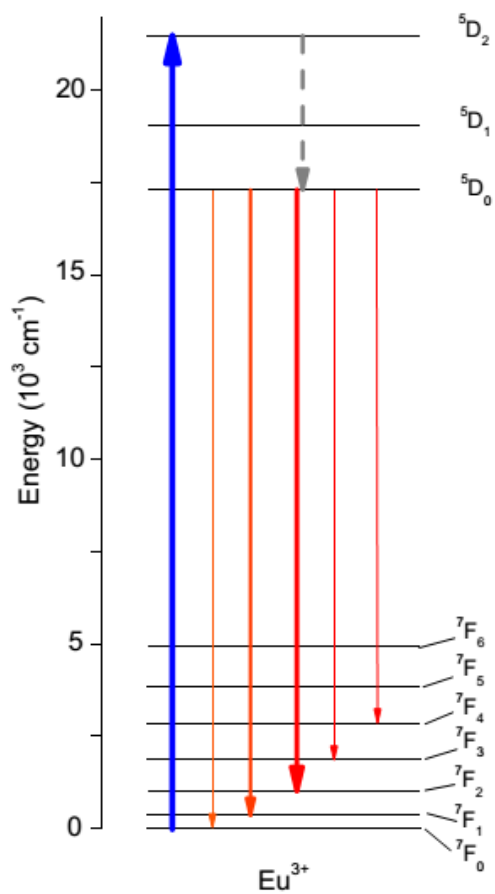

a)

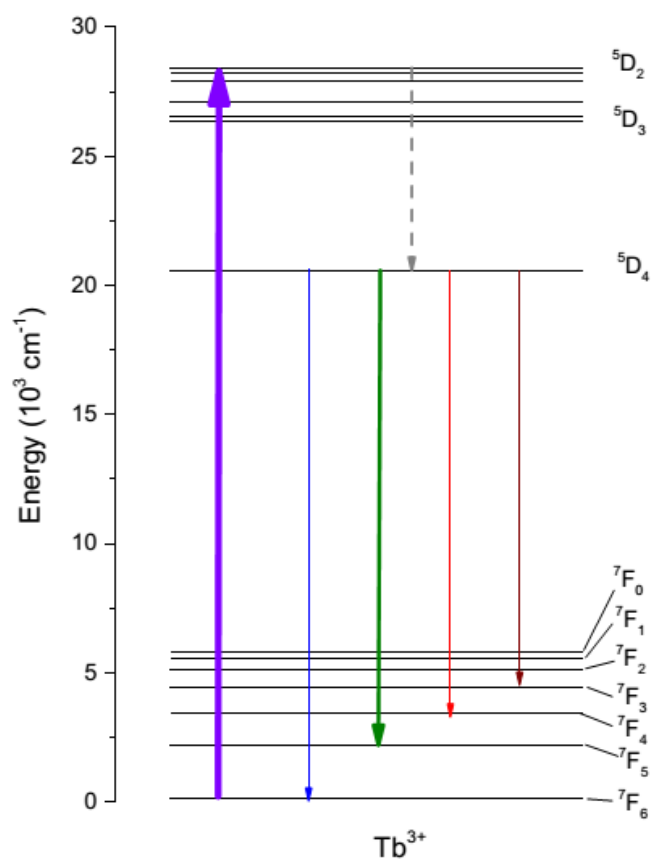

b)

**Figure E.S.I. 7** Energy levels diagrams for a)  $\text{Eu}^{3+}$  and b)  $\text{Tb}^{3+}$
